# Supplementary material for: Phenotypic Variation in Vietnamese Osteogenesis Imperfecta Patients Sharing a Recessive P3H1 Pathogenic Variant
Source: MDPI journal article supplement (doi:10.3390/genes13030407), 2022-02-24
Supplement: s1 [file s1]

**Table S1.**

List of genes analysed in targeted next-generation sequencing OI and related disorders panel of 41

genes at the Genome Diagnostic Laboratory of Amsterdam UMC.

*ALPL, ANO5, B3GALT6, B3GAT3, B4GALT7, BMP1, CCDC134, CHST3, COL1A1, COL1A2, CREB3L1, CRTAP, FKBP10, GORAB, IFITM5, KDELR2, LIFR, LRP5, MBTPS2, MESD, NBAS, P3H1, P4HA1, P4HB, PLOD2, PLOD3, PLS3, PPIB, SEC24D, SERPINF1, SERPINH1, SGMS2, SLC10A7, SP7, SPARC, TAPT1, TENT5A, TMEM38B, WNT1, XYLT1, XYLT2*

**Table S2.**

Primers used for Sanger sequencing analysis of the *P3H1* gene in patients' siblings and parents.

| Exon     | Primer         | Sequence 5'-3'           | Tm    | Product (bp) |
|----------|----------------|--------------------------|-------|--------------|
| Exon 1   | Forward primer | GGTCCTGAGCATGGAACG       | 57.79 | 425          |
|          | Reverse primer | GCCAGGAGGCCACTTTC        | 57.51 |              |
| Intron 1 | Forward primer | CGAGTGAGAAGCTAGTAGCGG    | 60.00 | 228          |
|          | Reverse primer | GCACTCTGGCATTCCGAAAAA    | 59.73 |              |
| Exon 2   | Forward primer | TGGATGTGAGCATTATCCACC    | 57.79 | 266          |
|          | Reverse primer | ACAGAGCAAGACTCTGTCTCTAA  | 58.60 |              |
| Exon 5   | Forward primer | TTTGACTCTTTCCTCTCAGCC    | 57.59 | 230          |
|          | Reverse primer | AGGTCTGAGTTCAGCTGG       | 55.81 |              |
| Exon 6   | Forward primer | CAGGGCTGAGTTCAGCTGG      | 56.40 | 188          |
|          | Reverse primer | ATCTCTCCTGCTCACTCTTTC    | 56.83 |              |
| Intron 7 | Forward primer | GCACTTGAGGCTTCCTGAGCCC   | 65.66 | 116          |
|          | Reverse primer | GCTCTGAGGACTGCATTCCA     | 59.75 |              |
| Exon 8   | Forward primer | CCCTGGAATGCAGTCCT        | 55.56 | 208          |
|          | Reverse primer | CCTGGCTCCCTGACAAC        | 56.75 |              |
| Exon 10  | Forward primer | GCTGCCCTGGCTAACATCA      | 60.08 | 179          |
|          | Reverse primer | ACCCCTTTCTCCACACTCT      | 57.42 |              |
| Exon 11  | Forward primer | GAGCCAAACCATATCAGTCG     | 56.31 | 262          |
|          | Reverse primer | AGCACAGAGCTGAGGTACA      | 57.94 |              |
| Exon 12  | Forward primer | AGTTCATTGGGCATTCCGTA     | 57.20 | 284          |
|          | Reverse primer | TCTGAGGAGGGCACAGAC       | 57.88 |              |
| Exon 13  | Forward primer | AAAGGGAGGCAGGGAAG        | 55.44 | 192          |
|          | Reverse primer | CTTTGGGAACATCAGCTGTAGAA  | 58.67 |              |
| Exon 14  | Forward primer | TCTGAGAGTGGATTACAGTCTTTG | 57.97 | 252          |
|          | Reverse primer | GAACGGGTCACACAGCA        | 59.89 |              |
| Exon 15  | Forward primer | TAGCGAGTGTCTGGAGCG       | 58.81 | 257          |
|          | Reverse primer | TTCTCTCCATGGGTCTAGT      | 56.75 |              |

**Table S3.**

Collagen type I  $\alpha$  chain Pro986 residue 3-hydroxylation described previously in patients with *P3H1* pathogenic variants.

| Pathogenic variant        | Zygosity              | Protein change          | Effect                   | 3-Hyp (%)                  | OI severity | Reference                                     |
|---------------------------|-----------------------|-------------------------|--------------------------|----------------------------|-------------|-----------------------------------------------|
| c.1080+1G>T               | Homozygous            | p.?                     | Splice site              | 0-4                        | II/III      | (Cabral et al. 2007), (Baldridge et al. 2008) |
| c.1080+1G>T / g.1473+1G>T | Compound heterozygous | p.?                     | Splice site/ Splice site | 0                          | II/III      | (Cabral et al. 2007)                          |
| c.747delC/ c.1080+1G>T    | Compound heterozygous | p.(Tyr250Metfs*87)/ p.? | Frameshift/ Splice site  | 10                         | II/III      | (Cabral et al. 2007)                          |
| c.1656C>A                 | Homozygous            | p.(Tyr552*)             | Nonsense                 | 4                          | III         | (Cabral et al. 2007)                          |
| c.232delC                 | Homozygous            | p.(Gln78Serfs*30)       | Frameshift               | 15                         | II/III      | (Baldridge et al. 2008)                       |
| c.933C>G                  | Homozygous            | p.(Tyr311*)             | Nonsense                 | 5                          | III         | (Baldridge et al. 2008)                       |
| c.2041C>T                 | Homozygous            | p.(Arg681*)             | Nonsense                 | 4                          | II/III      | (Baldridge et al. 2008)                       |
| c.1383_1389dup            | Homozygous            | p.(Lys464Glufs*19)      | Frameshift               | 6                          | III         | (Baldridge et al. 2008)                       |
| c.1170+2T>A               | Homozygous            | p.?                     | Splice site              | 7                          | II/III      | (Baldridge et al. 2008)                       |
| c.628C>T                  | Homozygous            | p.(Arg210*)             | Nonsense                 | NA (Significantly reduced) | II/III      | (Willaert et al. 2009)                        |
| c.1102C>T/ c.2055+18G>A   | Compound heterozygous | p.(Arg368*)/ p.?        | Nonsense /               | NA (Significant)           | III         | (Willaert et al. 2009)                        |

|                  |                |     |                |                                      |     |                              |
|------------------|----------------|-----|----------------|--------------------------------------|-----|------------------------------|
|                  |                |     | Splice<br>site | tly<br>reduced)                      |     |                              |
| c.2055+18G><br>A | Homozygo<br>us | p.? | Splice<br>site | NA<br>(Significan<br>tly<br>reduced) | III | (Willaert<br>et al.<br>2009) |
